# Supplementary material for: Understanding transmission and control of the pork tapeworm with CystiAgent: a spatially explicit agent-based model
Source: PubMed Central journal article supplement (PMC7379812; doi:10.1186/s13071-020-04226-8), 2020-07-24
Supplement: 13071_2020_4226_MOESM3_ESM.pdf [file 13071_2020_4226_MOESM3_ESM.pdf]

**Additional file 3: Figure S2.** Latin hypercube sampling-partial rank correlation coefficient (LHS-PRCC) results of full and reduced models across low, medium, and high-density villages. Parameters with significant LHS-PRCC coefficients ( $p < 0.0015$ ) shown. See table 1 (main text) for description of model parameters).

| Parameters                | Full Model (k = 33 parameters) |        |         | Reduced Model (k = 22 parameters) |          |        |
|---------------------------|--------------------------------|--------|---------|-----------------------------------|----------|--------|
|                           | High                           | Medium | Low     | High                              | Medium   | Low    |
| <b>Pig</b>                |                                |        |         |                                   |          |        |
| tuning-pig <sup>§</sup>   | ●●● ●●                         | ●●● ●● | ●●● ●●● |                                   |          |        |
| corral-always             | ●●● ●●                         | ●●● ●● | ●●● ●●  | ●● ●●                             | ●● ●     | ● +    |
| prop-corrals              | ●●● ●                          | ●●● ●● | ●●● ●   |                                   |          |        |
| corral-sometimes          | + +                            | ● +    | ● +     | ● +                               | + +      | + +    |
| prop-corral-some          | + +                            | ●● +   | ● +     | ● +                               | + +      | + +    |
| home-range                | + +                            | + +    | ● +     | ●●● ●●●                           | ●●● ●●   | ●● ●●  |
| latrine-use               | + +                            | + +    | ● +     | ●● ●●                             | ●● ●●    | ●● ●●  |
| humans-per-hh             | + +                            | + +    | ● +     |                                   |          |        |
| prop-latrines             | + +                            | + +    | + +     |                                   |          |        |
| slaughter-age             | + +                            | + +    | + +     | + +                               | + +      | + +    |
| decay-mean                |                                |        | + +     | + +                               | + +      | + +    |
| cont-radius               |                                |        |         | + +                               | + +      |        |
| home-range-sd             |                                |        |         | + +                               | + +      | + +    |
| <b>Human</b>              |                                |        |         |                                   |          |        |
| tuning-human <sup>§</sup> | ■●●● +                         | ■●●● ● | ■●●● ●● |                                   |          |        |
| prop-pig-owners           | ■●●● +                         | ■●●● + | ■●●● ●● |                                   |          |        |
| tn-lifespan               | ■●●● +                         | ■●●● ● | ■● ●●   | ■●●● ●●●                          | ■●●● ●●● | ■● ●●● |
| pigs-per-hh               | ■●●● +                         | ■●●● + | ■● ●    |                                   |          |        |
| pigs-exported             | ■●●● +                         | ■●●● + | ■● ●    | ■●●● ●●                           | ■●●● ●●  | ■● ●●  |
| pigs-sold                 | ■● +                           | ■● +   | ■● ●    | ■● ●●                             | ■● ●●    | ■● ●●  |
| hh-only-pork              | ■                              | ■      | ■ +     | + +                               | ■ +      | + +    |
| shared-pork-hh            | ■                              | ■      | ■ +     | ■ +                               | ■ +      | + +    |
| pig-import-rate           | ■                              | + +    | + +     | ■● ●                              | ■ ●      | ■ ●    |
| import-prev               | ■                              | ■      | + +     | ■● ●                              | ■● ●     | ■ ●    |
| sold-pork                 | + +                            | + +    | + +     | + +                               | + +      |        |
| travel-duration           | + +                            |        |         |                                   |          |        |
| travel-incidence          |                                |        |         | + +                               |          | + +    |
| light-to-heavy            |                                |        |         | + +                               | + +      | + +    |
| traveler-prop             |                                |        |         |                                   | + +      |        |

■ = Human taeniasis, ● = Porcine cysticercosis

SOBOL first-order indices ( $S_i$ ): ■■■ / ●●● > 0.25; ■■ / ●● > 0.1; ■ / ● > 0.02

PRCC (absolute-value of  $\rho$ ): ■■■ / ●●● > 0.5; ■■ / ●● > 0.25; ■ / ● > 0.1; + / + < 0.1; (all  $p < 0.0015$ )

<sup>§</sup>tuning-pig (4 parameters) and tuning-human (2 parameters) represent the combined impact of each set.
